# Supplementary material for: Decorating chromatin for enhanced genome editing using CRISPR-Cas9
Source: PubMed Central journal article supplement (PMC9894255; doi:10.1073/pnas.2204259119), 2022-12-02
Supplement: pnas.2204259119.sapp.pdf [file pnas.2204259119.sapp.pdf]

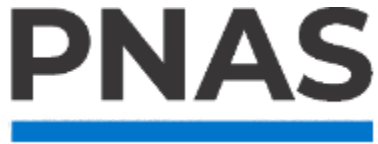

## Supporting Information for

Decorating chromatin for enhanced genome editing using CRISPR-Cas9

Evelyn Chen<sup>a,b,1</sup>, Enrique Lin-Shiao<sup>a,b,1,2</sup>, Marena Trinidad<sup>a,b</sup>, Mohammad Saffari Doost<sup>a,b</sup>, David Colognori<sup>a,b</sup>, and Jennifer A. Doudna<sup>a-h,3</sup>

<sup>a</sup>Department of Molecular and Cell Biology, University of California, Berkeley, Berkeley, CA USA 94720

<sup>b</sup>Innovative Genomics Institute, University of California, Berkeley, Berkeley, CA USA 94720

<sup>c</sup>Howard Hughes Medical Institute, University of California, Berkeley, Berkeley, CA USA 94720

<sup>d</sup>Department of Chemistry, University of California, Berkeley, Berkeley, CA USA 94720

<sup>e</sup>Molecular Biophysics and Integrated Bioimaging Division, Lawrence Berkeley National Laboratory, Berkeley, CA USA 94720

<sup>f</sup>California Institute for Quantitative Biosciences, University of California, Berkeley, Berkeley, CA USA 94720

<sup>g</sup>Gladstone Institutes, University of California, San Francisco, CA USA 94158

<sup>h</sup>Gladstone-University of California, San Francisco Institute of Genomic Immunology, San Francisco, CA USA 94158

<sup>1</sup>E.C. and E.L.-S. contributed equally to this work.

<sup>2</sup>Present address: Cystic Fibrosis Foundation, Bethesda MD USA 20814.

<sup>3</sup>Correspondence to: [doudna@berkeley.edu](mailto:doudna@berkeley.edu).

This PDF file includes:

Figures S1 to S4

Tables S1 to S4

SI References

A)

|        | PTM                 | Biological Process                                                             | Presumed Role in DNA Repair                                                           |
|--------|---------------------|--------------------------------------------------------------------------------|---------------------------------------------------------------------------------------|
| PRDM9  | H3K4me3<br>H3K36me3 | Localization of meiotic recombination hotspots                                 | H3K36me3 and H3K4me3 recruit ZCWPW1 to facilitate repair of SPO11-induced DSBs via HR |
| SETD2  | H3K36me3            | DNA repair by HR, mismatch repair, V(D)J recombination, transcription fidelity | H3K36me3 recruits CtIP to promote DSB resection and RPA and RAD51 foci formation      |
| SETMAR | H3K4me3<br>H3K36me2 | DNA repair by NHEJ, suppression of chromosomal translocations                  | H3K36me2 stabilizes NSB1 and Ku70 at DSB sites to promote NHEJ repair.                |

B)

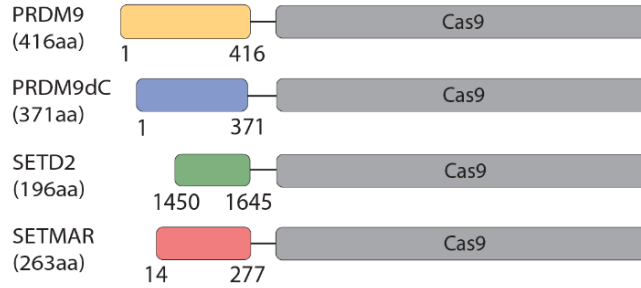

C)

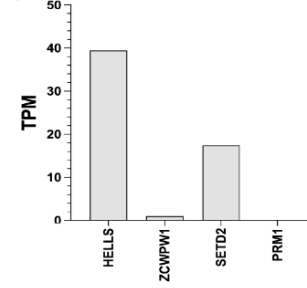

D)

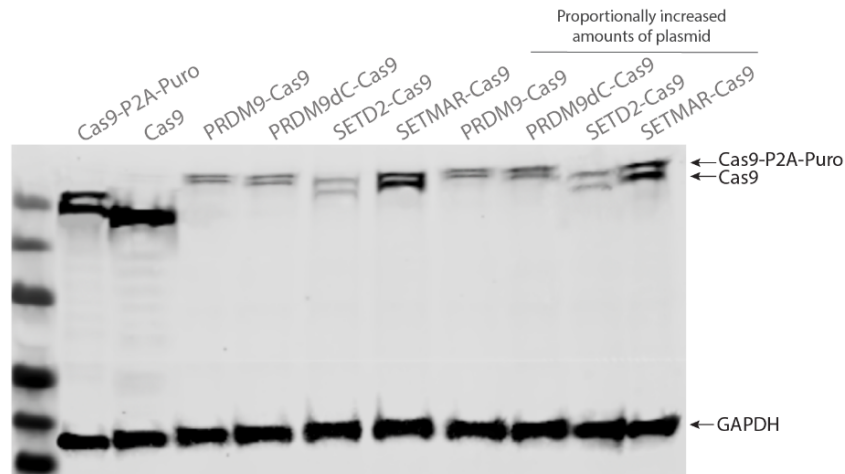

E)

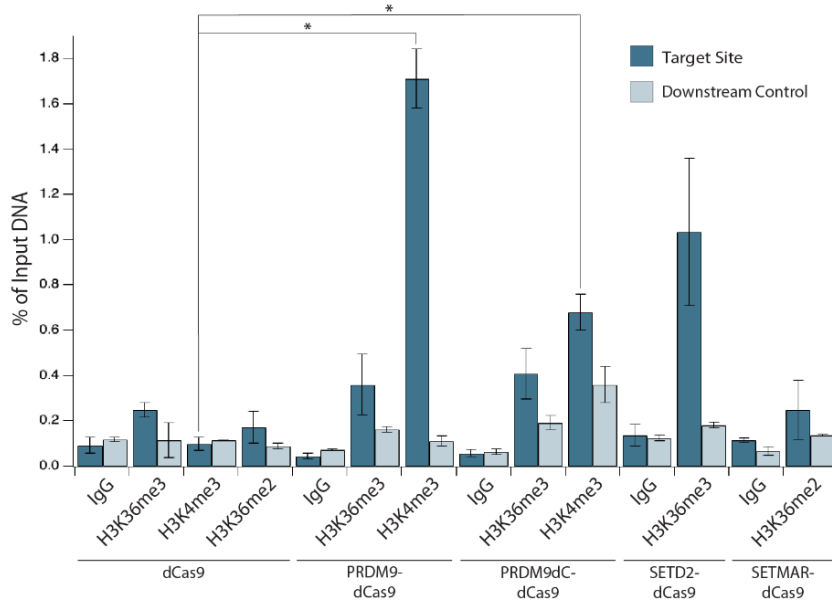

**Fig. S1.** Cas9-methyltransferase fusion protein design to modulate the choice of DNA repair pathway

- A) Summary of histone methyltransferases used for Cas9 fusion protein engineering, histone posttranslational modifications (PTM) deposited, biological processes, and their presumed role in DNA repair.
- B) Schematic of four Cas9-methyltransferase fusion proteins designed to decorate chromatin to modulate the choice of DNA repair pathway following Cas9-induced DSBs. The histone methyltransferases are fused to Cas9 at the N-terminus, and the amino acid positions of the fused proteins selected for cloning are indicated.
- C) Expression levels of relevant genes (HELLS, ZCWPW1) based on RNA-seq experiments in HEK293T cells. Positive control (SETD2) and negative control (PRM1) genes were included.
- D) Western blot analysis of fusion protein expression in HEK293T cells. GAPDH antibody was used as a loading control. Double bands were due to incomplete cleavage at the self-cleaving P2A peptide, leading to an uncleaved byproduct (1).
- E) H3K36me3, H3K4me3, and H3K36me2 enrichment shown as a percentage of input DNA measured by CHIP-qPCR at site C9 in HEK293T cells at 3 dpt. Cells were transfected with plasmids expressing the dCas9 fusion proteins and sgRNA. Data represents mean  $\pm$  s.d. (n = 2). \* $P < 0.05$ , determined by student's two-tailed t-test.

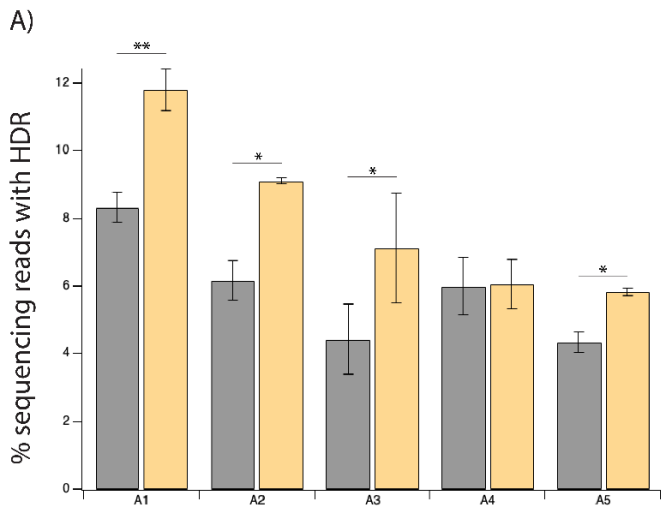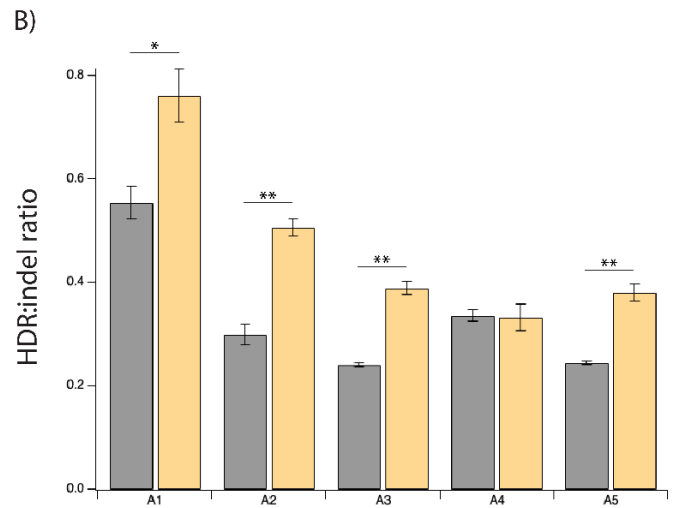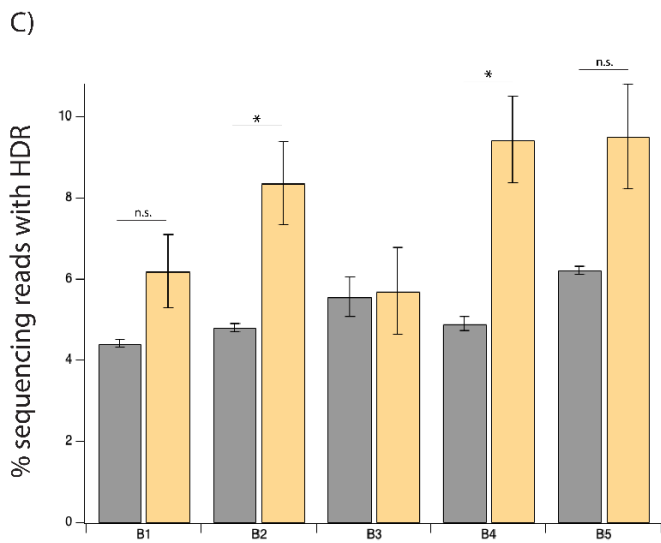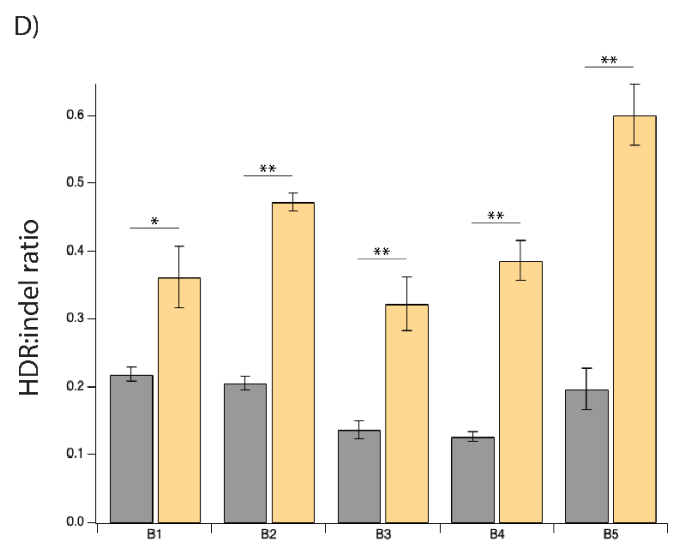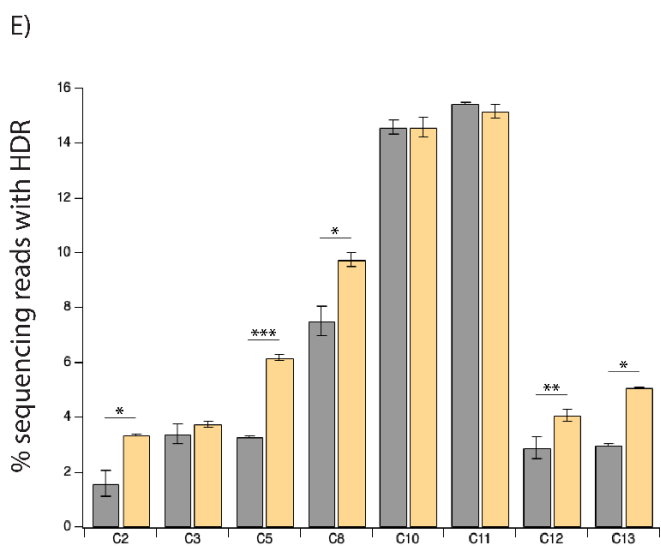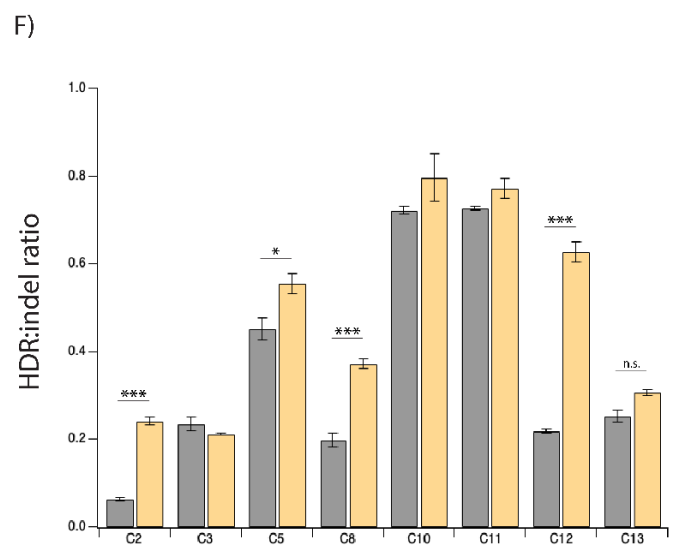

**Fig. S2.** HDR efficiency and HDR:indel ratio improvement by PRDM9-Cas9 at multiple genomic loci

- A)** HDR frequency and **B)** HDR:indel ratio measured by NGS at five genomic loci enriched with H3K36me3 in HEK293T cells transfected with PRDM9-Cas9 and sgRNA with ssODN template.
  - C)** HDR frequency and **D)** HDR:indel ratio measured by NGS at five genomic loci enriched with H3K36me3 and H3K4me3 in HEK293T cells transfected with PRDM9-Cas9 and sgRNA with ssODN template.
  - E)** HDR frequency and **F)** HDR:indel ratio measured by NGS at eight genomic loci lacking H3K36me3 and H3K4me3 in HEK293T cells transfected with PRDM9-Cas9 and sgRNA with ssODN template.
- For A-F, data represents mean  $\pm$  s.d. (n = 3). \* $P$  < 0.05, \*\* $P$  < 0.01, \*\*\* $P$  < 0.001, determined by student's two-tailed t-test.

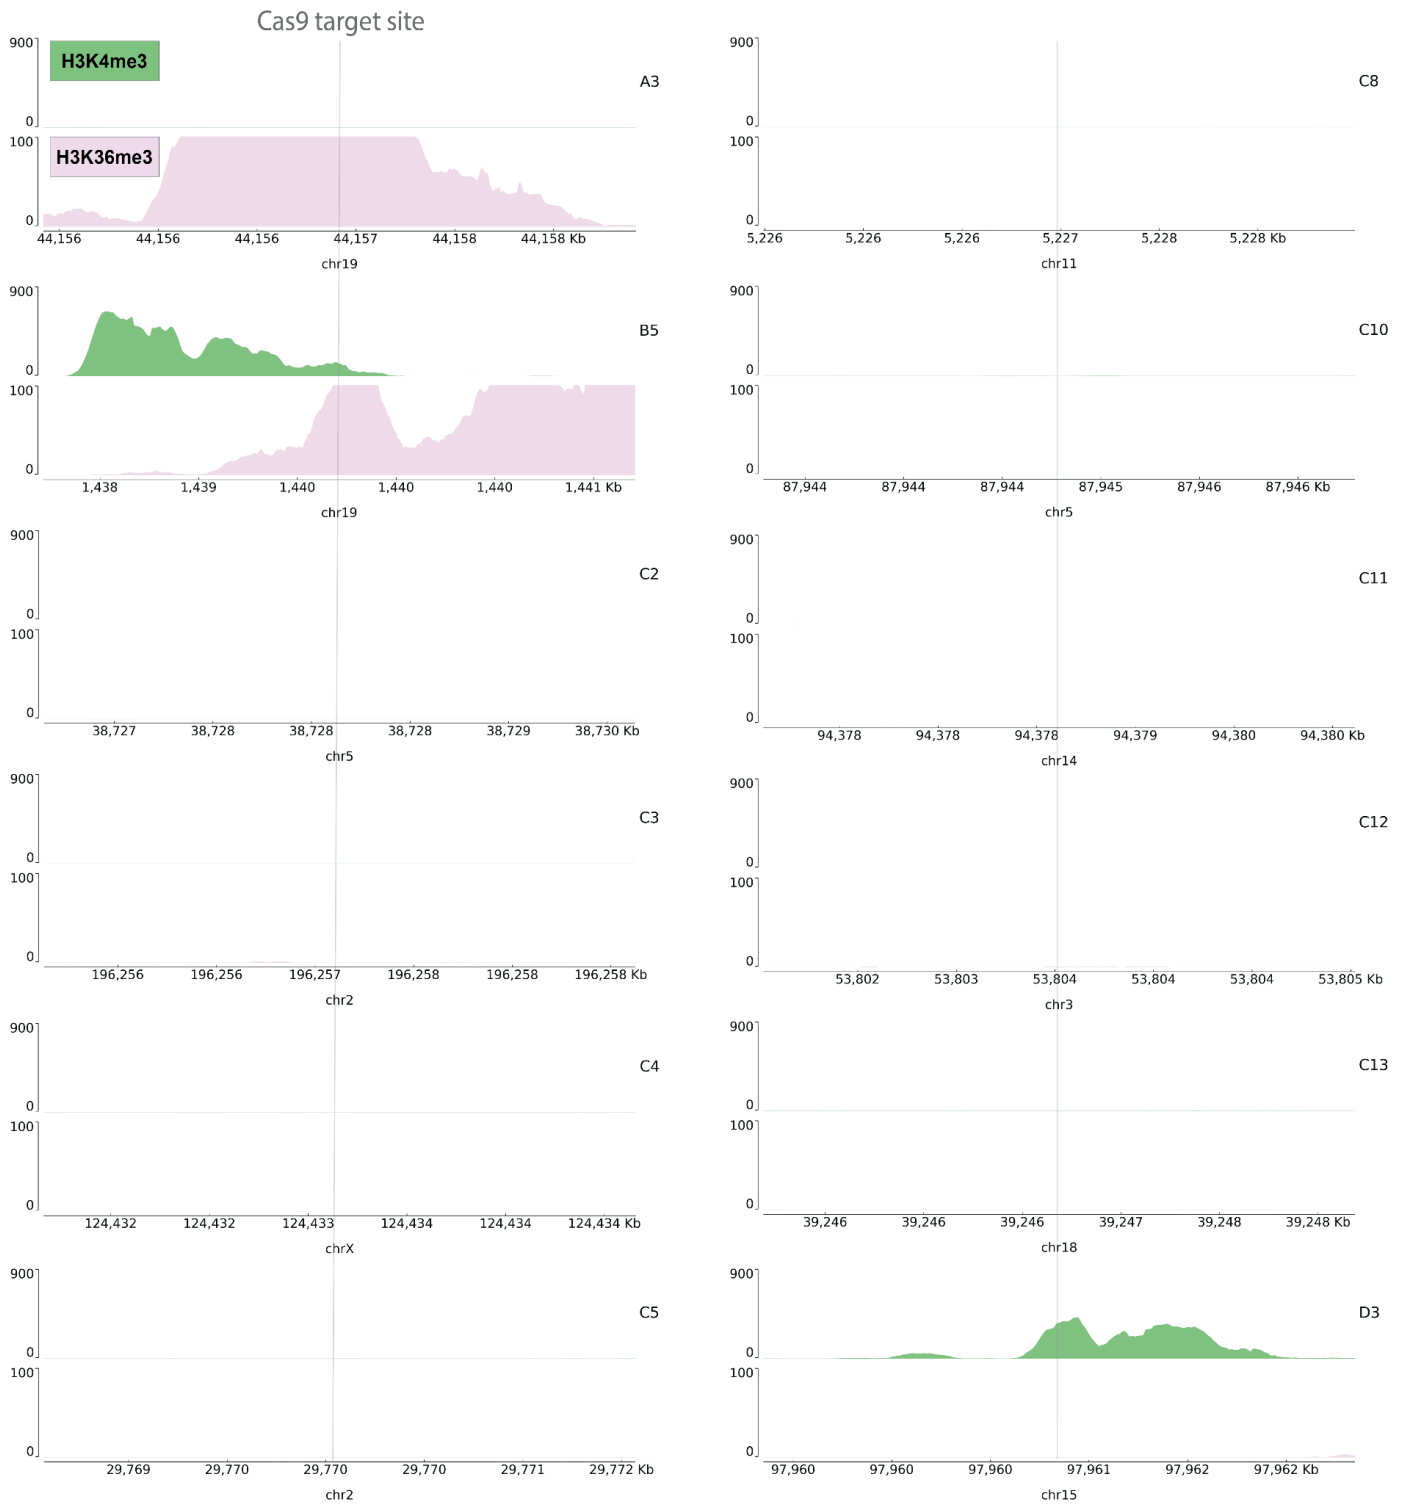

**Fig. S3.** UCSC genome browser tracks showing endogenous levels of H3K4me3 and H3K36me3 enrichment at additional genomic sites. Tracks represent target site  $\pm$  1.5 kilobases (kb) in HEK293 cells based on ENCODE ChIP-seq datasets for H3K4me3 (green) and H3K36me3 (pink). Each plot spans 3 kb and the y-axis reports the negative-log p-value for peak enrichment.

A)

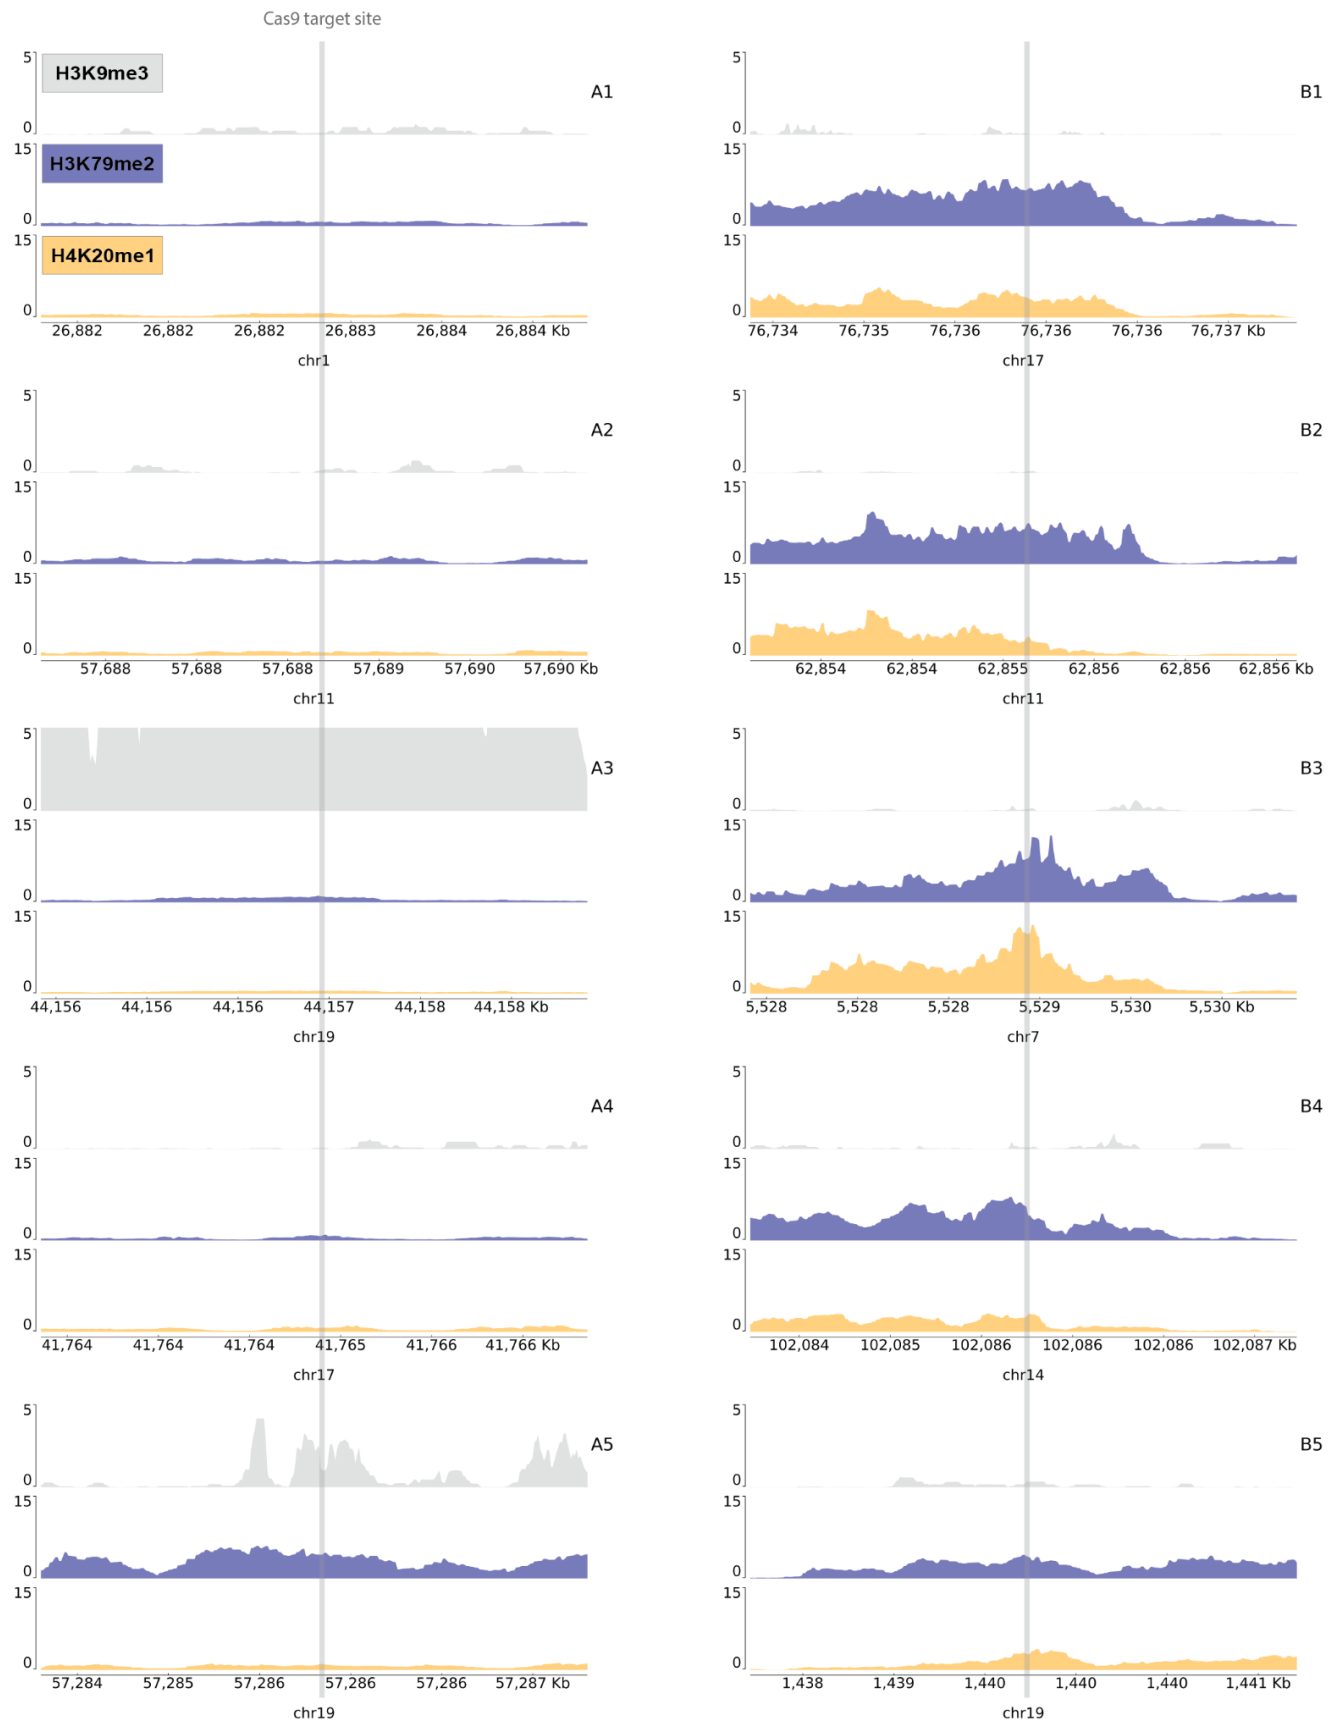

B)

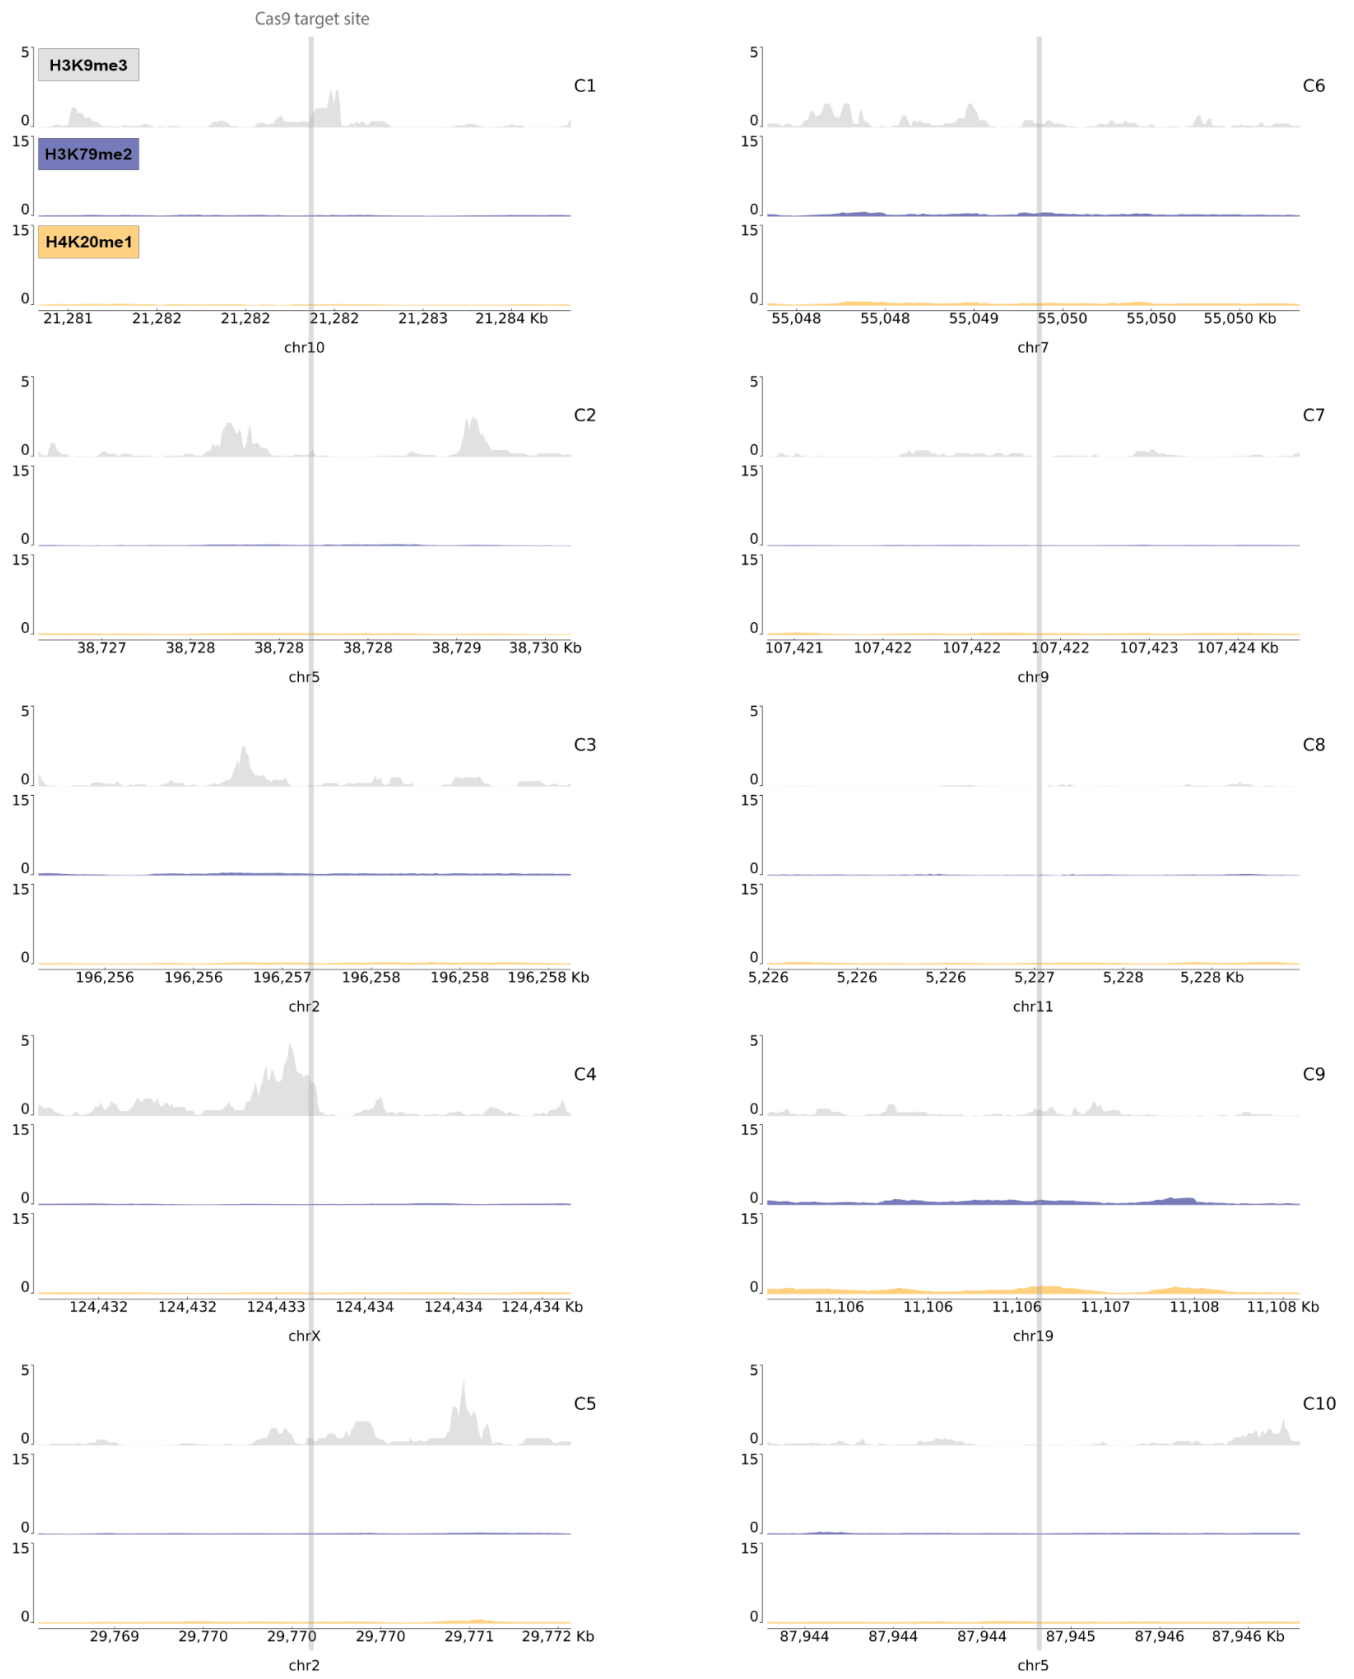



C)

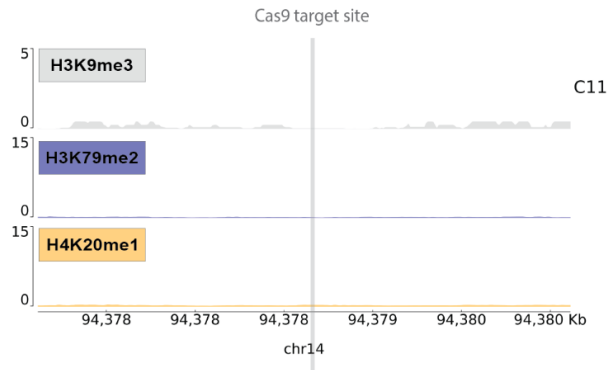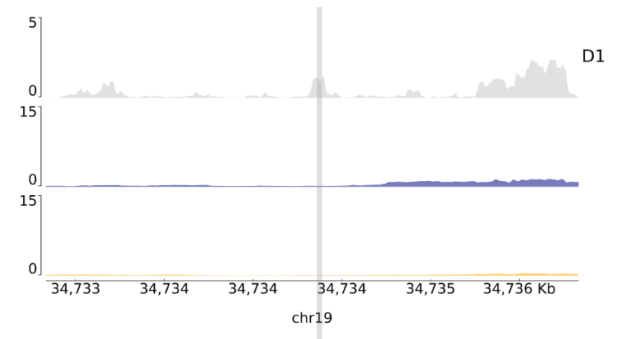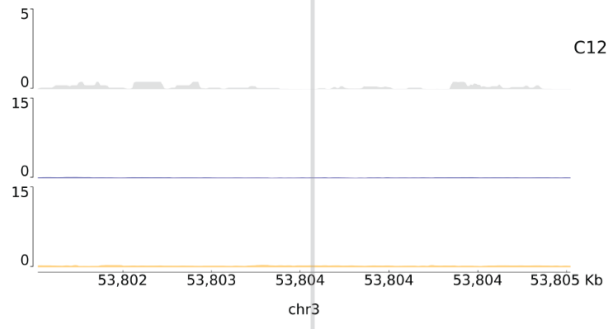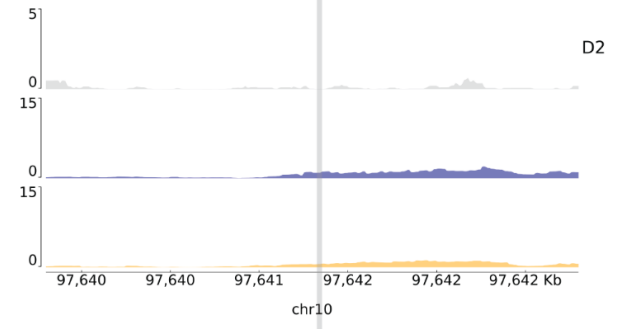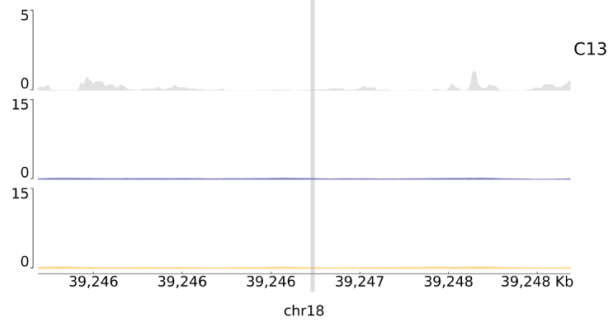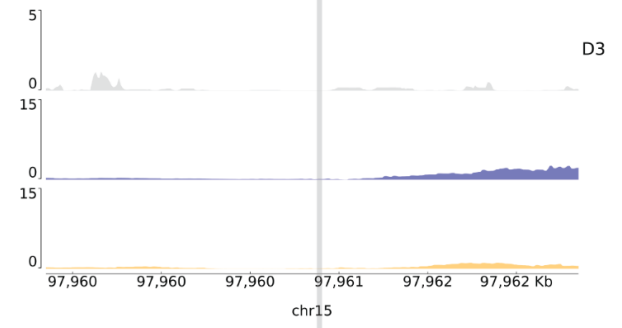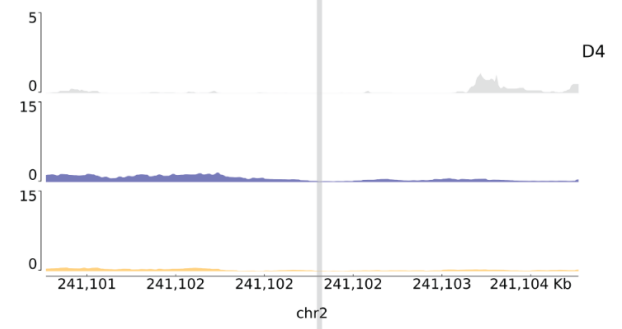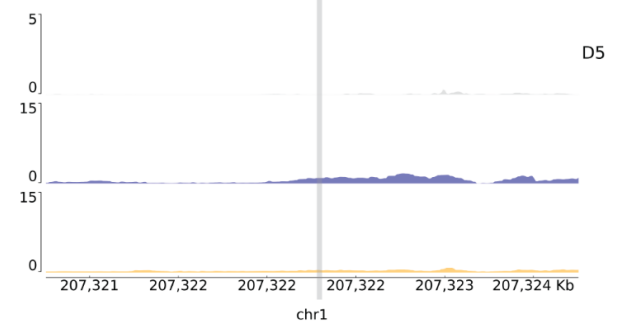

**Fig. S4.** UCSC genome browser tracks showing normalized endogenous levels of H3K9me3, H3K79me2, and H4K20me1 at genomic sites

Tracks represent target site  $\pm$  1.5 kilobases (kb) in HEK293 cells based on ENCODE ChIP-seq datasets for H3K9me3 (gray), H3K79me2 (blue), and H4K20me1 (yellow) at **A**) sites A1-A5 and B1-B5, **B**) sites C1-C10, and **C**) sites C11-C13 and D1-D5. Each plot spans 3 kb and the y-axis reports the negative-log p-value for peak enrichment.

**Table S1.** Single guide RNA (sgRNA) sequences and HDR products

| Site    | Locus    | sgRNA and PAM sequence                | Change encoded by ssODN template                        |
|---------|----------|---------------------------------------|---------------------------------------------------------|
| A1      | GPN2     | GGACAGCTCTGGATGTCCCA <sub>tgg</sub>   | GGACAGCTCTGGATGT <b>G</b> CCAt <sub>gg</sub>            |
| A2      | ZDHHC5   | GTTGTCACAGACACTGCAGT <sub>ggg</sub>   | GTTGTCACAGACACT <b>G</b> AGT <sub>ggg</sub>             |
| A3      | ZNF234   | TATTAAGTGCTGATCTACGA <sub>cgg</sub>   | TATTAAGTGCTGATCT <b>T</b> CGA <sub>cgg</sub>            |
| A4      | JUP      | TCAGTCAGCCATGCTCCCCG <sub>tgg</sub>   | TCAGTCAGCCATGCT <b>C</b> CCG <sub>tgg</sub>             |
| A5      | ZNF460   | GTGGAAGAAGCAATCCTAA <sub>ggg</sub>    | GTGGAAGAAGCAAT <b>C</b> TAA <sub>ggg</sub>              |
| B1      | SRSF2    | GGAGACCGCAGCTTTAAAG <sub>ggg</sub>    | GGAGACCGCAGCTTTA <b>T</b> AG <sub>ggg</sub>             |
| B2      | SNHG1    | CATGGTTTATGCTCTTACAG <sub>agg</sub>   | CATGGTTTATGCTCTT <b>T</b> CAG <sub>agg</sub>            |
| B3      | ACTB     | GCTCGTGTGACAAGGCCAT <sub>Gagg</sub>   | GCTCGTGTGACAAG <b>G</b> CCAT <sub>Gagg</sub>            |
| B4      | HSP90AA1 | TTCACTGGTTAAGTGAGCGG <sub>tgg</sub>   | TTCACTGGTTAAGT <b>G</b> ACCG <sub>tgg</sub>             |
| B5      | RPS15    | AAAGGCCTCTAAAAACGCAG <sub>ggg</sub>   | AAAGGCCTCTAAAA <b>C</b> CCAG <sub>ggg</sub>             |
| C1      | NEBL     | ACAATGCAAGAGGCTCCGT <sub>Aagg</sub>   | ACAATGCAAGAGGCT <b>C</b> GT <sub>Aagg</sub>             |
| C2      | OSMR-DT  | ACTGAATTCCTTGAAGACCG <sub>ggg</sub>   | ACTGAATTCCTTGAAG <b>T</b> CCG <sub>ggg</sub>            |
| C3      | HECW2    | GGATGAGCGTCCCAACCACT <sub>ggg</sub>   | GGATGAGCGTCCCA <b>A</b> CCACT <sub>ggg</sub>            |
| C4      | TENM1    | CTTGGTTGAATCTAATCACG <sub>ggg</sub>   | CTTGGTTGAATCTAAT <b>G</b> ACG <sub>ggg</sub>            |
| C5      | ALK      | GTCTCTTGCTGGATATGGGA <sub>agg</sub>   | GTCTCTTGCTGGATAT <b>C</b> GGA <sub>agg</sub>            |
| C6      | EGFR     | GTAATGAAATGAGTTGGGGC <sub>agg</sub>   | GTAATGAAATGAGTT <b>G</b> CGGC <sub>agg</sub>            |
| C7      |          | GGCCCAGACTGAGCACGTGA <sub>tgg</sub>   | GGCCCAGACTGAGCA <b>A</b> GTGA <sub>tgg</sub>            |
|         |          |                                       | GGCCCAGACTGAGCA <b>A</b> GTGAT <b>TT</b> (PAM mutation) |
| C8      | HBB      | GTAACGGCAGACTTCTCCTC <sub>agg</sub>   | GTAACGGCAGACTTCTCC <b>A</b> C <sub>agg</sub>            |
| C9      | LDLR     | CAGAGCACTGGAATTCGTCA <sub>agg</sub>   | CAGAGCACTGGAATT <b>A</b> GTCA <sub>agg</sub>            |
|         |          |                                       | CAGAGCACTGGAATT <b>A</b> GTCA <b>GTG</b> (PAM mutation) |
| C10     |          | GAACACAAAGCATAGACTGC <sub>ggg</sub>   | GAACACAAAGCA <b>G</b> AGACTGC <sub>ggg</sub>            |
|         |          |                                       | GAACACAAAGCA <b>G</b> AGACTGC <b>AC</b> (PAM mutation)  |
| C11     | SERPINA1 | TGCTGACCATCGACGAGAA <sub>agg</sub>    | TGCTGACCATCGAC <b>A</b> AGAA <sub>agg</sub>             |
| C12     | CACNA1D  | GGAGCAGGAGTATTTAGTAGT <sub>Gagg</sub> | GGAGCAGGAGTATTTAGT <b>T</b> GT <sub>Gagg</sub>          |
| C13     |          | AAGATGCAAGGTTTGTGTCT <sub>agg</sub>   | AAGATGCAAGGTTTGT <b>C</b> TCT <sub>agg</sub>            |
| D1      | ZNF181   | TTGCCCGCTCACCAGCGACG <sub>cgg</sub>   | TTGCCCGCTCACCAG <b>C</b> ACG <sub>cgg</sub>             |
| D2      | PI4K2A   | GCATCCCTAAATCCTGCCAG <sub>ggg</sub>   | GCATCCCTAAATCCT <b>G</b> CCAG <sub>ggg</sub>            |
| D3      | ARRDC4   | GGCAGGAAAGAGTCGCCCG <sub>Gcgg</sub>   | GGCAGGAAAGAGTCGC <b>G</b> CCG <sub>Gcgg</sub>           |
| D4      | MTERF4   | GGCCGAACGCAGCCATAGCG <sub>cgg</sub>   | GGCCGAACGCAGCCAT <b>T</b> GC <sub>cgg</sub>             |
| D5      | CD55     | GCAGCATCGTGTGCTCCACA <sub>cgg</sub>   | GCAGCATCGTGTGCT <b>C</b> GACA <sub>cgg</sub>            |
| BFP-GFP |          | GCTGAAGCACTGCACGCCAT <sub>ggg</sub>   | GCTGAAGCACTGCACGCC <b>GTACG</b>                         |

**Table S2.** Single-stranded oligonucleotide (ssODN) donor templates

| Site                       | Template Sequence                                                                                           |
|----------------------------|-------------------------------------------------------------------------------------------------------------|
| A1                         | CACTAACCAAGCTCCAAAAGTCTGGCTGCCTCTTGGACAGCTCTGGATGTGCCATGGACCCCTGA<br>ACACAGCACATCTGCCAGCTCTTGTCCCTTTTCATCC  |
| A2                         | GTCTTACCCACCCAGGGTGTCTTACCTCCACACAGTTGTCACAGACACTGGAGTGGGAACATCGA<br>GGGGGACGGTAAAAGCGGCAGGTGGCACACCATTTTC  |
| A3                         | TATGTTTTCTCTCCTGTGTGGACCATGCAATGATTATTAAGTGCTGATCTTCGACGGAAGTTCTTAC<br>CACATGTATCACATTTGAATGGTTTCTCCCCAGT   |
| A4                         | CGGCTGGGGTGGGAGCTCTGCCAGCTGCCAGGCTCAGTCAGCCATGCTCCCGTGGCTGATG<br>GCACCCCTATCCCTGCCCCAGGTGGGATGCAGGCCCTG     |
| A5                         | AAAACAAGGAGGCCATAAAGAATGGGAGACATGAGTGGAAGAAGTCAATCGTAAGGGAACAGGGC<br>AGCAGAGTGAGGGGTAGACGTGGTACTCCACGCTT    |
| B1                         | TCTGCAATACTGGCCAATATTCTTTTATCAAACAGGAGACCCGAGCTTTATAGGGGGAAAATGCAG<br>ACGTTGGATAAAAACAGCAAGAAATAGTCATTTTC   |
| B2                         | AGCCAGCGTTACAGTAATGTTCCAGGTAGGTGTACATGGTTTATGCTCTTCAGAGGAGACCTTGT<br>AGATAACCACTCCATGATGAACACAAAATGACAAG    |
| B3                         | TAAGACAGTGTTGTGGGTGTAGGTACTAACACTGGCTCGTGTGACAAGGCATGAGGCTGGTGTGA<br>AAGCGGCCTTGGAGTGTGTATTAAGTAGGTGCACAG   |
| B4                         | ACAGTGAGGACAGACACAGGTAGGCACCTGAACATTCCTGGTTAAGTGACCGGTGGAAGGGTG<br>GGGTGCTGCAACCCTTGGACCCCTGGGGATGCGGTGA    |
| B5                         | CTCAGACAAGGTGCTGCAGCGTACAGCTCGGGCCAAAGGCCTCTAAAACCCAGGGGAAGGCAG<br>GTAGGGCGCAGTGGCTCCCGCCTGTGATCCAGCACT     |
| C1                         | GGAATTCCTTCATTACAAATATTTATTAGTACCTACAATGCAAGAGGCTCGGTAGGGAGCACAAACC<br>TAAGGAAAGGTGCAAACAAACAAAACCAAGCTTT   |
| C2                         | GAGCTTATGGTAGAGTTAGAGAAAAGAATGCACAACCTGAATTCCTTGAAGTCCGGGGCCTCGACTT<br>AAAATGTGATTATAGGGAGTGGAGTGGAAAGGGGTC |
| C3                         | TATGCTGTTCCTTTTAATTCTCTGGAGGTTACAGGGATGAGCGTCCCAACGACTGGGTAGAGCAAA<br>GCATTATTTACTATGGCTTGCCTACATTTGAGGG    |
| C4                         | TTACATCACTGTCATGTTAGGGTTTTCTGTTATTCTTGGTTGAATCTAATGACGGGGAAGACAGTGC<br>TCTGTTAGGCTTTGGTCTTGACTGGAGTTACTCA   |
| C5                         | ATTTCTCCAATTCCAGATAGTAAAGAAGCCTTTGGTCTCTTGCTGGATATCGGAAGGGGATTTGTGG<br>ATCCAGCTGCTTCTTGAATGAACTTTCATCAAGG   |
| C6                         | CTTCAGGAGAAATAATGAAGAAAGAGGCGGTTTGGTAATGAAATGAGTTGCGGCAGGAGATTACG<br>GTCATTTCAAGTTATATTCAAATTCTTCTTTTTG     |
| C7 (lacks PAM mutation)    | GCTTCTCCAGCCCTGGCCTGGGTCAATCCTTGGGGCCAGACTGAGCAAGTGATGGCAGAGGA<br>AAGGAAGCCCTGCTTCTCCAGAGGGCGTCGCAGGAC      |
| C7 (contains PAM mutation) | GCTTCTCCAGCCCTGGCCTGGGTCAATCCTTGGGGCCAGACTGAGCAAGTGATTTTCAGAGGAA<br>AGGAAGCCCTGCTTCTCCAGAGGGCGTCGCAGGAC     |
| C8                         | ACTTCATCCACGTTACCTTGCCCCACAGGGCAGTAACGGCAGACTTCTCCACAGGAGTCAGATG<br>CACCATGGTGTCTGTTTGGAGTTGCTAGTGAACAC     |
| C9 (lacks PAM mutation)    | ATCAACACACTCTGTCCTGTTTTCCAGCTGTGGCCACCTGTCCGCTGACTAATTCCAGTGCTCT<br>GATGGAAACTGCATCCATGGCAGCCGGCAGTGTGA     |
| C9 (contains PAM mutation) | ATCAACACACTCTGTCCTGTTTTCCAGCTGTGGCCACCTGTCCGACTGACTAATTCCAGTGCTCT<br>GATGGAAACTGCATCCATGGCAGCCGGCAGTGTGA    |

|                             |                                                                                                                                   |
|-----------------------------|-----------------------------------------------------------------------------------------------------------------------------------|
| C10 (lacks PAM mutation)    | TTTTCCAGCCCGCTGGCCCTGTAAAGGAAACTGGAACACAAAGCAGAGACTGCGGGGCGGGCC<br>AGCCTGAATAGCTGCAAACAAGTGCAGAATATCTGAT                          |
| C10 (contains PAM mutation) | TTTTCCAGCCCGCTGGCCCTGTAAAGGAAACTGGAACACAAAGCAGAGACTGCGACGCGGGCCA<br>GCCTGAATAGCTGCAAACAAGTGCAGAATATCTGAT                          |
| C11                         | CATGGGTATGGCCTCTAAAAACATGGCCCCAGCAGCTTCAGTCCCTTTCTTGTCGATGGTCAGCA<br>CAGCCTTATGCACGGCCTGGAGGGGAGAGAAGCAG                          |
| C12                         | ATGGCTATTTAGGGACCCCCACTGCTTGGGGGAGCAGGAGTATTTAGTTGTGAGGAATGCTAC<br>GAGGATGACAGCTCGCCACCTGGAGCAGGTGAGCT                            |
| C13                         | AGAACTGGAATCACTATATGTTTATGTGAAAAAATGAACCTAGAGACAAACCTTGCATCTTTCAA<br>AAATTAACCAAAAATAGATTGTAGACATAAATG                            |
| D1                          | TCTGGGCAGTGTTCGTCCCCAGAGGTCGGCGGCCGTTGCCCGCTCACCAGCCACGCGGGGCGC<br>CTGCGGGGACGGTGAGGCCCTGCTGAGGACTCCGGCCAG                        |
| D2                          | TTCCGCAGAGCGTCCCAGCTCCAGTCCAGTGGCATCCCTAAATCCTGCAGGGGCTGGTAC<br>TGTGAAGTTTCTCCCTTTCCCTCTGGCTGTGCGAAG                              |
| D3                          | GCGACCCCGGCTCCGGGCCTCTGCCGACCTCAGGGGCAGGAAAGAGTCGCGCGGCGGGATGG<br>GCGGGGAGGCTGGGTGCGCGGCGGCCGTGGGTGCCGAGG                         |
| D4                          | AGAAGCCCGCGCGCCCAGCTCGAGCTTACCTGACGGCCGAACGCAGCCATTGCGCGGAGAAGA<br>TGGCAGCAGTTACGGCGCCGGAAGCAGCGGTCCTCCCC                         |
| D5                          | AATGCCACACCTGAAAGAGATGACATGCAAGTTTGCAGCATCGTGTGCTCGACACGGCTGGACTC<br>TGTCGAGAGTGGGGAACGGTCAGCGGTCTGGCCTCC                         |
| BFP-GFP                     | GCCACCTACGGCAAGCTGACCCTGAAGTTCATCTGCACCACCGGCAAGCTGCCCGTGCCCTGG<br>CCCACCCTCGTGACCACCCTGACGTACGGCGTGAGTGTTCAGCCGCTACCCCGACCACATGA |

**Table S3.** PCR primers for constructing next-generation sequencing libraries

| Site     | Primer                                                |
|----------|-------------------------------------------------------|
| A1 (for) | TCCCTACACGACGCTCTTCCGATCTAGGAGGGAGCAGGTTTGTCA         |
| A1 (rev) | G TTCAGACGTGTGCTCTTCCGATCTGGACACCTACCCATGACCTTG       |
| A2 (for) | TCCCTACACGACGCTCTTCCGATCTGATGATTTCCGAGCTCCCCT         |
| A2 (rev) | G TTCAGACGTGTGCTCTTCCGATCTGGATGAAGACAATGAAGGTTAAGCA   |
| A3 (for) | TCCCTACACGACGCTCTTCCGATCTAGGGCCTTCATACATGCTTCC        |
| A3 (rev) | G TTCAGACGTGTGCTCTTCCGATCTACACTTACCACAGTCCTCACAT      |
| A4 (for) | TCCCTACACGACGCTCTTCCGATCTGCTGGTGAGTATGATGGCCTTG       |
| A4 (rev) | G TTCAGACGTGTGCTCTTCCGATCTCTGTTGCTGGTCAGGTGCTT        |
| A5 (for) | TCCCTACACGACGCTCTTCCGATCTGCTATTTGGAGTTCCTCCC          |
| A5 (rev) | G TTCAGACGTGTGCTCTTCCGATCTAGGAAATGAAGAACACCCCCG       |
| B1 (for) | TCCCTACACGACGCTCTTCCGATCTAGCTTAGATAATAATGGCTGTTTCG    |
| B1 (rev) | G TTCAGACGTGTGCTCTTCCGATCTAGAAACTGGTCCCTGGAGGA        |
| B2 (for) | TCCCTACACGACGCTCTTCCGATCTGATGTTCCAGCCCACAAGAGC        |
| B2 (rev) | G TTCAGACGTGTGCTCTTCCGATCTACATCACTTGAAAGTTCAGCCA      |
| B3 (for) | TCCCTACACGACGCTCTTCCGATCTTCTGGTGTTTGTCTCTCTGACTA      |
| B3 (rev) | G TTCAGACGTGTGCTCTTCCGATCTGGACATGCAGAAAGTGCAAAG       |
| B4 (for) | TCCCTACACGACGCTCTTCCGATCTAGTAACTGTGATCACCAAACATAAC    |
| B4 (rev) | G TTCAGACGTGTGCTCTTCCGATCTGATCGTTGGGCAAACACAAA        |
| B5 (for) | TCCCTACACGACGCTCTTCCGATCTTGAACCTCCTGGGCTCAA           |
| B5 (rev) | G TTCAGACGTGTGCTCTTCCGATCTCGTGTGACTGCAGAGATTC         |
| C1 (for) | TCCCTACACGACGCTCTTCCGATCTAATGGATGAGCTCTCTGCGG         |
| C1 (rev) | G TTCAGACGTGTGCTCTTCCGATCTACACTATGGTAGCCGTCCCT        |
| C2 (for) | TCCCTACACGACGCTCTTCCGATCTGCTGAGAAGGACTTCAAGAGAT       |
| C2 (rev) | G TTCAGACGTGTGCTCTTCCGATCTCCATATGTGAGAAATAAACAGTCCTAC |
| C3 (for) | TCCCTACACGACGCTCTTCCGATCTAGTAGTTTAGAAAGGAAACTGGCAA    |
| C3 (rev) | G TTCAGACGTGTGCTCTTCCGATCTAAAACCTGCCTGAAAGGCTCA       |
| C4 (for) | TCCCTACACGACGCTCTTCCGATCTAGGTGATTCATCCAGAGGTGTA       |
| C4 (rev) | G TTCAGACGTGTGCTCTTCCGATCTAAACCACACATCTAGCCTGG        |
| C5 (for) | TCCCTACACGACGCTCTTCCGATCTGGTAGTTTACCCTCCTCCTCTA       |
| C5 (rev) | G TTCAGACGTGTGCTCTTCCGATCTAGGCATTGATTGTGCTATCTCTA     |
| C6 (for) | TCCCTACACGACGCTCTTCCGATCTGGTATCTGCCAGAAAGCTCTA        |
| C6 (rev) | G TTCAGACGTGTGCTCTTCCGATCTGCTGAGTGCAGTGGGAGAGA        |
| C7 (for) | GCTCTTCCGATCTGGAAACGCCCATGCAATTAGTC                   |
| C7 (rev) | GCTCTTCCGATCTCTTGTCAACCAGTATCCCGGTG                   |
| C8 (for) | GCTCTTCCGATCTCTTGATACCAACCTGCC                        |
| C8 (rev) | GCTCTTCCGATCTTAAAAGTCAGGGCAGAGCCA                     |

|           |                                                  |
|-----------|--------------------------------------------------|
| C9 (for)  | GCTCTTCCGATCTGCCCTGCTTCTTTTTCTCTGGT              |
| C9 (rev)  | GCTCTTCCGATCTACCATTAACGCAGCCAACTTCA              |
| C10 (for) | GCTCTTCCGATCTCCAGCCCCATCTGTCAAAC                 |
| C10 (rev) | GCTCTTCCGATCTGAATGGATTCTTGGAACAATG               |
| C11 (for) | GCTCTTCCGATCTTTTGTGAACTTGACCTCGGGG               |
| C11 (rev) | GCTCTTCCGATCTTCAGGGAGGGAGAGGATGTG                |
| C12 (for) | TCCCTACACGACGCTCTTCCGATCTAGGAGATGAACAGCTCCCAACTA |
| C12 (rev) | G TTCAGACGTGTGCTCTTCCGATCTGCTTTTTAGGGGAAGCCCAAGT |
| C13 (for) | GCTCTTCCGATCTTGACACACACACATGAAAT                 |
| C13 (rev) | GCTCTTCCGATCTCCAAACGCAAGATCATGTAGA               |
| D1 (for)  | TCCCTACACGACGCTCTTCCGATCTGTCCGCCCGCTGTAG         |
| D1 (rev)  | G TTCAGACGTGTGCTCTTCCGATCTACCCAGGGCCTGAGCC       |
| D2 (for)  | TCCCTACACGACGCTCTTCCGATCTGGTGAGTGCGGGGGTG        |
| D2 (rev)  | G TTCAGACGTGTGCTCTTCCGATCTTCTCCCCACCAAGTAGG      |
| D3 (for)  | TCCCTACACGACGCTCTTCCGATCTCCTTACCCTGCCGCGAG       |
| D3 (rev)  | G TTCAGACGTGTGCTCTTCCGATCTCTCGTCCTCGAACACCAGAC   |
| D4 (for)  | TCCCTACACGACGCTCTTCCGATCTGGGCCGGAAGTGAAGGAC      |
| D4 (rev)  | G TTCAGACGTGTGCTCTTCCGATCTACCTGGCCGTGAAACTC      |
| D5 (for)  | TCCCTACACGACGCTCTTCCGATCTAGGGAGGGCTCAAAGAGACT    |
| D5 (rev)  | G TTCAGACGTGTGCTCTTCCGATCTTTCAAGACACAAGCCCCCTT   |

**Table S4.** ChIP-qPCR primers

| Site             | Primer                 |
|------------------|------------------------|
| C7 (for)         | CGCCTGTGATGGGCTAATTG   |
| C7 (rev)         | GGCCTCTCCAGCCTCATTG    |
| C7 control (for) | CCACATTGGCTCCACCCATC   |
| C7 control (rev) | CTTGGTTGTGTCACGTGGTT   |
| C9 (for)         | GTTGGCTGCGTTAATGGTGA   |
| C9 (rev)         | TCATTTGCAAGCAGCAAGGC   |
| C9 control (for) | AGGCTGAGACAGGAGAATCA   |
| C9 control (rev) | GAATGCAATGGCACGATATTGG |



## SI References

1. J. H. Kim, *et al.*, High cleavage efficiency of a 2A peptide derived from porcine teschovirus-1 in human cell lines, zebrafish and mice. *PLOS ONE* **6**, e18556 (2011).
